## RESEARCH ARTICLE

# Live-attenuated CHIKV vaccine with rearranged genome replicates *in vitro* and induces immune response in mice

Irina Tretyakova<sup>1</sup>, Joongho Joh<sup>2</sup>, Mary Gearon<sup>2</sup>, Jennifer Kraenzle<sup>2</sup>, Sidney Goedeker<sup>2</sup>, Ava Pignataro<sup>2</sup>, Brian Alejandro<sup>2</sup>, Igor S. Lukashevich<sup>3</sup>, Donghoon Chung<sup>2\*</sup>, Peter Pushko<sup>1\*</sup>

**1** Medigen, Inc., Frederick, Maryland, United States of America, **2** Department of Microbiology and Immunology, School of Medicine, University of Louisville, Louisville, Kentucky, United States of America, **3** Department of Pharmacology and Toxicology, School of Medicine, and the Center for Predictive Medicine for Biodefense and Emerging Infectious Diseases, University of Louisville, Louisville, Kentucky, United States of America

\* [hoon.chung@louisville.edu](mailto:hoon.chung@louisville.edu) (DC); [ppushko@medigen-usa.com](mailto:ppushko@medigen-usa.com) (PP)

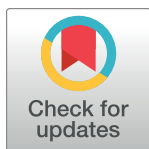

## OPEN ACCESS

**Citation:** Tretyakova I, Joh J, Gearon M, Kraenzle J, Goedeker S, Pignataro A, et al. (2024) Live-attenuated CHIKV vaccine with rearranged genome replicates *in vitro* and induces immune response in mice. *PLoS Negl Trop Dis* 18(4): e0012120. <https://doi.org/10.1371/journal.pntd.0012120>

**Editor:** Tereza Magalhaes, Texas A&M University, UNITED STATES

**Received:** September 18, 2023

**Accepted:** March 29, 2024

**Published:** April 22, 2024

**Copyright:** © 2024 Tretyakova et al. This is an open access article distributed under the terms of the [Creative Commons Attribution License](https://creativecommons.org/licenses/by/4.0/), which permits unrestricted use, distribution, and reproduction in any medium, provided the original author and source are credited.

**Data Availability Statement:** All relevant data are within the manuscript files. Additional data are available at [bioRxiv 2023.09.16.558061](https://doi.org/10.1101/2023.09.16.558061); doi: <https://doi.org/10.1101/2023.09.16.558061>.

**Funding:** Research reported in this publication was supported by the National Institute of Allergy and Infectious Diseases of the National Institutes of Health ([www.nih.gov](https://www.nih.gov)) to P.P. under Award Number R43AI152717. The funder had no role in study design, data collection and analysis, decision to publish, or preparation of the manuscript.

## Abstract

Chikungunya fever virus (CHIKV) is a mosquito-borne alphavirus that causes wide-spread human infections and epidemics in Asia, Africa and recently, in the Americas. CHIKV is considered a priority pathogen by CEPI and WHO. Despite recent approval of a live-attenuated CHIKV vaccine, development of additional vaccines is warranted due to the worldwide outbreaks of CHIKV. Previously, we developed immunization DNA (iDNA) plasmid capable of launching live-attenuated CHIKV vaccine *in vivo*. Here we report the use of CHIKV iDNA plasmid to prepare a novel, live-attenuated CHIKV vaccine V5040 with rearranged RNA genome. In V5040, genomic RNA was rearranged to encode capsid gene downstream from the glycoprotein genes. Attenuated mutations derived from experimental CHIKV 181/25 vaccine were also engineered into E2 gene of V5040. The DNA copy of rearranged CHIKV genomic RNA with attenuated mutations was cloned into iDNA plasmid pMG5040 downstream from the CMV promoter. After transfection *in vitro*, pMG5040 launched replication of V5040 virus with rearranged genome and attenuating E2 mutations. Furthermore, V5040 virus was evaluated in experimental murine models for general safety and immunogenicity. Vaccination with V5040 virus subcutaneously resulted in elicitation of CHIKV-specific, virus-neutralizing antibodies. The results warrant further evaluation of V5040 virus with rearranged genome as a novel live-attenuated vaccine for CHIKV.

## Author summary

Chikungunya fever virus (CHIKV) is transmitted to humans by infected mosquitoes. The virus causes disease outbreaks and epidemics in Asia, Africa and recently, in the Americas. Despite recent approval of a live-attenuated CHIKV vaccine, additional vaccines are warranted due to the worldwide distribution of CHIKV. We developed bacterial plasmid DNA that codes for CHIKV virus V5040 with rearranged genome as an experimental

**Competing interests:** I have read the journal's policy and the authors of this manuscript have the following competing interests: P.P. and I.T. are employed by Medigen, Inc. (Frederick, MD, USA). The remaining authors declare that the research was conducted in the absence of any commercial or financial relationships that could be construed as a potential conflict of interest.

CHIKV vaccine. The vaccine virus was prepared in cultured cells and tested in mice. The results showed that genome rearrangement did not prevent replication of V5040 virus. Mice injected with V5040 vaccine virus developed immune response that prevented infection with related CHIKV. The results suggest that V5040 CHIKV with genome rearrangement deserves additional studies as a potential vaccine to prevent infections with CHIKV.

## Introduction

Chikungunya virus (CHIKV) is a mosquito-borne alphavirus that causes epidemics of chikungunya fever. Outbreaks of CHIKV are continuing worldwide [1]. CHIKV is transmitted to humans primarily by *Aedes aegypti* mosquito [2,3]. In addition, during the 2005–2006 epidemic in Reunion islands in the Indian Ocean that affected more than one-third of the island population and caused 284 deaths, a new mosquito vector *A. albopictus*, was identified [3,4]. Outbreaks of CHIKV included India in 2005–2006 with estimated 1.3 million people infected [5,6] and the Americas since 2014, with more than 150,000 confirmed CHIKV infections in the Caribbean region only [7]. CHIKV is also widespread in Africa and South East Asia [7,8]. With an increase in global travel, the risk for rapid expansion of CHIKV to non-endemic areas has increased [9,10]. Some travelers are viremic, and *A. albopictus* is common in urban areas of the U.S., raising concerns for the immunologically naïve population [11]. Local transmission cases have been reported in Europe and the U.S. [11–15]. Changing climate patterns also favor geographical expansion of CHIKV [16]. Given the current large outbreaks and the worldwide distribution of *A. aegypti* and *A. albopictus*, CHIKV represents a global public health threat [1].

CHIKV causes fever, headache, rash, nausea, myalgia, and arthralgia [17]. Complications include respiratory failure, cardiovascular disease, hepatitis, cutaneous effects, and central nervous system problems [18,19]. More than 50% of patients who suffer from severe infection are over 65 years old, and more than 33% of them die. Therefore, CHIKV vaccine is needed. Recently, live-attenuated CHIKV vaccine has been approved in the U.S. suggesting that live virus CHIKV vaccines can be configured to meet stringent safety and efficacy standards. Available therapeutic interventions include anti-inflammatory drugs, fluids, and bed rest. Antivirals and agents that restrict the cell-to-cell spread of the virus can be useful, but not FDA-approved [20]. Arthralgia associated with the fever can persist for months or years and progresses to arthritis in some patients [21].

Recently, live-attenuated CHIKV vaccine of East/Central/South African (ECSA) lineage with an attenuating deletion of 61 amino acids in nsP3 protein was approved [22]. However, similarly to influenza and SARS-CoV-2 vaccines, and considering high impact and worldwide distribution of CHIKV, development of additional vaccines is warranted. Several live-attenuated vaccines have been evaluated in the clinical trials [23]. An investigational CHIKV vaccine clone 181/25 derived from an Asian lineage strain AF15561 has been immunogenic in a Phase II clinical trial; however, mild transient arthralgia was observed in some vaccinated individuals, indicating the need for safety improvement [24]. Because only two mutations are associated with attenuation of 181/25, the vaccine is genetically unstable and reversion mutations were detected, which can explain reactogenicity observed in the clinical trials [25,26]. Addressing the need for a safe and efficacious vaccine, we previously developed a novel plasmid DNA that expressed the full-length genomic RNA of live-attenuated CHIKV from a eukaryotic promoter — a strategy termed iDNA [27]. The iDNA plasmid can be transfected in cell culture to manufacture live-attenuated virus vaccine, or can be administered directly into patients'

tissues to generate live-attenuated virus *in vivo*. In the latter case, iDNA plasmid is taken up by a limited number of cells, and CHIKV genomic RNA is transcribed in these cells. As a result, CHIKV proteins are synthesized, genomic RNA is packaged into virus particle, and live-attenuated CHIKV is assembled and secreted from the cells. In immunocompetent BALB/c mice, the prototype 181/25-based iDNA plasmid vaccine demonstrated safety and protective efficacy [28].

In attempt to further improve CHIKV 181/25-based vaccine, here we used CHIKV iDNA plasmid as a reverse genetics system to engineer novel CHIKV vaccine. The V5040 CHIKV with a rearranged RNA genome was prepared with the view to improve safety. As described for numerous RNA viruses, rearrangement of viral genes results in attenuation and resistance to reversion to the wild type phenotypes [29]. We placed CHIKV capsid gene downstream the glycoprotein gene under control of a duplicate subgenomic 26S promoter. In addition, two attenuating mutations derived from the prototype 181/25 vaccine were maintained in the E2 glycoprotein region. We report that live virus with rearranged genome replicates after pMG5040 plasmid is transfected in Vero cells. Thus, rearranged CHIKV iDNA pMG5040 launches live-attenuated CHIKV V5040 in Vero cell culture. Furthermore, vaccination of mice with V5040 confirmed its general safety and elicitation of CHIKV-specific, virus-neutralizing serum antibodies. Finally, infection of V5040-vaccinated mice with CHIKV-nLuc virus expressing luciferase protein demonstrated resistance of vaccinated mice to infection with CHIKV. We conclude that V5040 vaccine can be a candidate vaccine for CHIKV, and further evaluation is warranted.

## Materials and methods

### Ethics statement

Research involving vertebrate animals (mice) was done according to approved by the University of Louisville institutional animal protocols, IACUC approval numbers 19675 and 22221, in compliance with the American Veterinary Medical Association recommendations.

### Cells and plasmids

Vero cell line (American Type Culture Collection, Manassas, VA) was maintained in a humidified incubator at 37°C in 5% CO<sub>2</sub> in  $\alpha$ MEM supplemented with 10% fetal bovine serum (FBS) and gentamicin sulfate (10  $\mu$ g/ml) (Life Technologies, Carlsbad, CA).

The pMG5040 plasmid was derived from iDNA plasmid p181/25 described elsewhere [28]. The pMG5040 was based on pUC backbone vector and encoded the full-length rearranged RNA genome of V5040 vaccine virus (Fig 1). The capsid (C) gene was cloned downstream from the glycoprotein (GP) gene and expressed using the duplicate subgenomic promoter. The ATG codon was introduced at the 5' of E2 gene within the glycoprotein genes, while a TGA stop codon was introduced at the 3' of the C gene. The full-length genomic cDNA of V5040 virus was placed in the pMG5040 under transcriptional control of the optimized CMV promoter. The hepatitis delta ribozyme was introduced downstream from the V5040 cDNA to ensure cleavage of the genomic RNA transcript after the synthetic poly(A) at the viral 3' end. The cDNA of V5040 also maintained attenuating mutations Thr12Ile and Gly82Arg (both in the E2 gene) derived from the 181/25 prototype vaccine sequence.

The iDNA plasmid pMG5040 containing the rearranged, full-length CHIKV iDNA was isolated from *E. coli*. The CHIKV sequence was confirmed by DNA sequencing. Bioinformatic analysis was performed to ensure that rearranged CHIKV sequences do not interfere with plasmid production in *E. coli* or the translation of the viral genome in eukaryotic cells. We confirmed the presence of the authentic ORFs and the absence of any strong internal bacterial

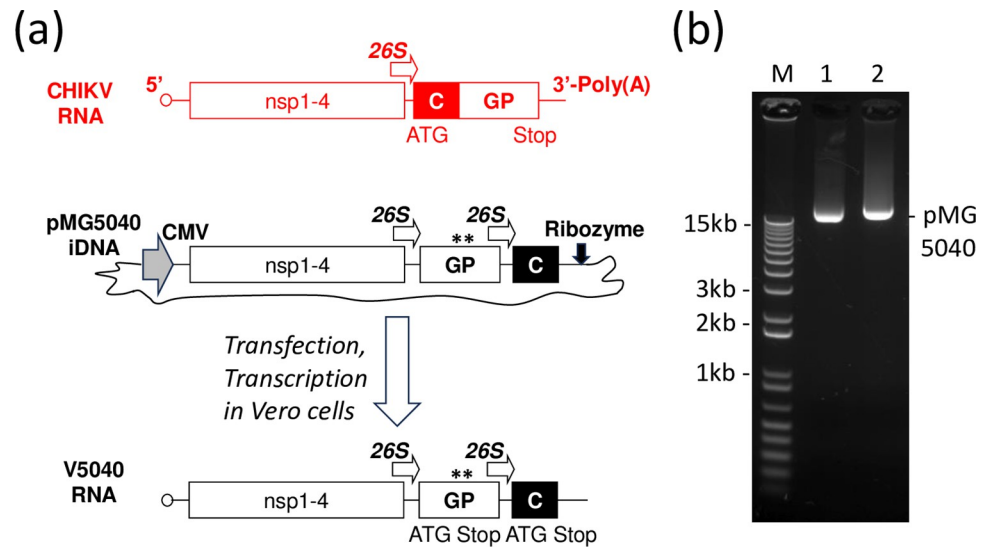

**Fig 1. Genetic maps depicting the pMG5040 plasmid encoding the full-length rearranged RNA.** (a) Indicated are approximate locations of cytomegalovirus (CMV) promoter (solid arrow), 26S promoter (open arrows) and attenuating mutations (asterisks). The wild type CHIKV genome is shown in red. CHIKV pMG5040 plasmid encoded rearranged full-length infectious CHIKV RNA under transcriptional control of the CMV promoter. The plasmid pMG5040 contained both attenuating mutations (asterisks) from the IND vaccine 181/25. (b) 1% Agarose/TAE gel showing pMG5040 plasmid as compared to control VEEV vaccine. M, 1kb Plus DNA ladder (Thermo); 1, VEEV control pMG4020; 2, CHIKV pMG5040.

<https://doi.org/10.1371/journal.pntd.0012120.g001>

promoter and transcription sites that can lead to expression of potentially toxic proteins and inhibit plasmid growth in *E. coli*. The ORFs were predicted by using NCBI ORF Finder software [30]. Potential bacterial promoters were predicted by using BPROM software [31], which is a bacterial promoter recognition program with approximately 80% accuracy and specificity. In addition, rearranged sequence was screened for potential splice sites that can lead to degradation of RNA in the nucleus, using software developed within Berkeley Drosophila Genome Project [32]. The amino acid sequence of CHIKV proteins was kept according to GenBank 181/25 TSI-GSD-218 CHIKV 181/25 vaccine #L37661 except additional Met at the start of GP genes, and a stop codon at the end of C gene (Fig 1).

The resulting plasmid pMG5040 was propagated in *E. coli* Stbl3 cells (Thermo, Carlsbad, CA) using standard Luria Broth LB medium in the presence of kanamycin. Plasmid was isolated by an endotoxin-free DNA isolation method (Qiagen, Valencia, CA), or a similar DNA isolation method, according to manufacturer's instructions. Finally, pMG5040 was formulated in phosphate-buffered saline (PBS) to a concentration of ~1 mg/ml. This process resulted in a transfection-grade, sterile DNA with 95% supercoiled DNA and an  $A_{260}/A_{280}$  ratio of ~1.9, as well as minimal residual endotoxin, RNA, genomic DNA, and protein impurities.

## Viruses

Live-attenuated vaccine virus V5040 was prepared by transfecting Vero cells with pMG5040 plasmid. Transfection was done by electroporation essentially as described previously [28,33]. Briefly, Vero cells were transfected with 100 ng of pMG5040 and incubated at 37°C. The transfection medium was harvested at 48 h post-transfection and filter-sterilized using 0.22 μm filter. The virus was then concentrated and partially purified by ultracentrifugation and resuspended in a phosphate buffered saline (PBS), pH7.4. The V5040 titer was determined by a standard plaque assay in Vero cell monolayers in 6-well tissue culture plates using serial

**Table 1. Primers used for preparation of CHIKV 181/25 clone expressing nLuc (CHIKV 181/25-nLuc) and for sequencing PCR fragment from cDNA of V5040 virus.** The nLuc gene was inserted within the nsP3 gene by Gibson cloning method at 5217 bp site as described in Materials and Methods.

|                             |                                                        |
|-----------------------------|--------------------------------------------------------|
| pCHIKV_nsP3_nLuc_vector_rev | AACGAAATCTTCGAGTGTGAAGACggttgtaagtgtaccgccc            |
| nsP3_nLuc_FWD               | ggggcggtacatacattaccaaccGTCTTCACACTCGAAGATTTCGTTGGGGAC |
| nsP3_nLuc REV               | cacggccgcaaggtttccgattatCGCCAGAATGCGTTCGCACAGCCG       |
| pCHIKV_nsP3_nLuc_vector_fwd | CGGCTGTGCGAACGCATTCTGGCGataatcggaacctgtgcccgtg         |
| SEQ_E3_Forw8461             | gtactatcagctgtacaag                                    |
| SEQ_C_Rev7561               | ggtacctcctattgtagaaagt                                 |

<https://doi.org/10.1371/journal.pntd.0012120.t001>

dilutions of the virus, and stained using neutral red. To detect the virus in the samples with low titers (below the limit of direct plaque assay, 25 PFU/ml), co-cultivation of test samples with Vero cells was used to amplify the low viral load. The transfection medium was used to infect Vero cells at a multiplicity of infection of 0.01 to generate V5040 passage 1 (P1) virus. The P1 virus was harvested at 48 hours postinfection (h.p.i.) and the titer of the V5040 P1 virus was determined. The virus was aliquoted and stored at  $-80^{\circ}\text{C}$  until used *in vitro* or *in vivo*.

To confirm genetic structure of V5040 P1 virus, viral RNA was extracted using Tizol LS, cDNA was prepared, and PCR was performed using Q5 high-fidelity DNA polymerase (New England Biolabs, Ipswich, MA) and SEQ primers (Table 1) specific for C (reverse primer) and E3 (forward primer) genes. The resulting 3.1 kb PCR fragment was sequenced using Sanger DNA sequencing to confirm rearrangement and attenuating mutations derived from 181/25 vaccine.

To determine virus growth kinetics, Vero cells were infected in 75 cm<sup>2</sup> flasks with 100 PFU or 1000 PFU of V5040 virus, or CHIKV 181/25 control virus, as described in the Results. In the same experiment, Vero cells were also transfected with 100 ng of pMG5040 by electroporation. Samples of the growth medium were taken at 12 h intervals.

As described above, CHIKV 181/25 vaccine virus was used as a control. The CHIKV 181/25 vaccine was received from the World Reference Center for Emerging Viruses and Arboviruses (WRCEVA) through the University of Texas Medical Branch (UTMB) in Galveston, Texas.

Molecular clone-derived CHIKV 181/25 clone expressing nLuc (CHIKV 181/25-nLuc) was generated by transfecting infectious RNA into cells. Briefly, the nLuc gene was inserted within the nsP3 gene by Gibson cloning method at 5217 bp site. The backbone and the insert were obtained by PCR with pTD181\_25, a plasmid with the full genome of CHIKV 181/25 provided from Dr. Kevin Sokoloski as a gift, and with a plasmid containing nLuc gene. Primer sets were used with Fusion high fidelity DNA polymerase (NEB M0530L) with the manufacturer-recommended protocol and standard molecular cloning techniques (Table 1). Constructed clones were validated by a whole plasmid sequencing were used as a template to generate infectious RNA by using *in vitro* transcription (ThermoFisher SP6 mMessage kit) after a linearization with Not I enzyme. Infectious virus was rescued from Vero76 cells transfected with the infectious *in vitro* transcribed RNA using Lipofectamine mMessenger max. Stock virus was generated by amplifying the rescued virus once in Vero76 and stored at  $-80^{\circ}\text{C}$  in aliquots until used. CHIKV-nLuc virus was used to detect neutralizing antibody, as well as in the infectious challenge experiment as described below.

### Immunizations of experimental mice

Female BALB/c mice (4–8 week-old, Noble Life Sciences, Woodbine, MD) were anesthetized with isoflurane prior to vaccinations and vaccinated subcutaneously (s.c.) with V5040 vaccine



virus (8 mice/group), or with control 181/25 vaccine (5 mice /group) in the dorsal area at the doses  $10^4$  and  $10^5$  PFU as indicated in the Results section. After vaccinations, animals were observed daily for signs of infection, morbidity, and potential signs of discomfort. Blood samples were collected from the retro-orbital sinus on days 0 (pre-bleed), day 2–4, and day 28. Viremia was evaluated on days 2–4 post-vaccination by either direct plaque assay, or by virus amplification in Vero cells followed by plaque assay. For virus amplification using co-cultivation, 20  $\mu$ L of serum in 2 mL of complete medium was used to infect Vero cells in 75 cm<sup>2</sup> flask for 1h, then 20 mL medium was added, and incubation was continued for 48 h. Supernatant was harvested, and the virus was assayed by plaque assay.

In another set of experiments, C57BL/6J mice (5–6 week-old, male/female, Jackson Laboratories) were vaccinated with test vaccines ( $10^5$  PFU/mouse, s.c. into footpad) or PBS sham control. Safety and immunogenicity were evaluated by measuring virus-neutralizing serum antibody as described above. To confirm V5040 CHIKV vaccine immunogenicity and protection from subsequent infection with CHIKV, in another experiment, albino C57/BL6 mice (3 weeks old, n = 4/group/sex) were vaccinated either with PBS, CHIKV 181/25, or V5040 via the s.c. route at the both flanks (50  $\mu$ L/site, a total of  $2 \times 10^5$  pfu/mouse). Three weeks later (21 days post vaccination, 6-week-old), animals were challenged with  $5 \times 10^5$  pfu of CHIKV181/25-nLuc at the right footpad via the s.c. Two days after challenge animals were subjected with bioluminescence imaging with 9  $\mu$ mole/kg of FFz (i.p. injection) using AMI HT (Spectral Instruments Imaging).

### Western blot and IFA

CHIKV-specific antibody response was determined using sera collected on day 28 post vaccination by Western blot and indirect immunofluorescence assay (IFA). Mouse serum was probed in western blot with the lysates of CHIKV 181/25 infected Vero cells at 1:100 dilution, followed by alkaline phosphatase (AP)-conjugated goat anti-mouse IgG (H+L) secondary antibody (1:1000 dilution). For IFA, Vero cells seeded in chamber slides were infected with V5040 at MOI 0.01. At 24 h post-infection, Vero monolayers developed foci of V5040-infected cells. Monolayers were fixed with acetone and probed with mouse serum diluted 1:25, followed by Fluorescein isothiocyanate (FITC)-conjugated goat anti-mouse IgG (H+L) secondary antibody (1:25 dilution). Nuclei were stained with VectaShield mounting medium containing propidium iodide (Vector Laboratories, Inc., Newark, CA).

### Plaque reduction neutralization test (PRNT<sub>50</sub>)

Neutralizing antibody was determined using PRNT<sub>50</sub>, as well as by using nLuc-expressing CHIKV. Briefly, C57BL/6J mice (n = 8–10/group equal number of sex) were sacrificed at various time points (3, 7, 14, 21, and 41 day post-vaccination) and the total blood was collected by terminal bleeding. For PRNT, diluted homologous virus was mixed with the same volume of serially diluted sera (1: 64 to 1: 2048, two-fold) and incubated at 37°C for one hour. Virus-serum mixture was added to Vero 76 cells confluent grown in 24-well plates and incubated at 37°C for 1h for virus adsorption. Cells were washed with PBS once, and overlaid with an overlay medium (1X EMEM with 2% FBS, 0.75% methylcellulose). After four days of incubation in a CO<sub>2</sub> incubator at 37°C, cells were fixed and viral foci were visualized with a crystal violet staining solution (2% paraformaldehyde, 10% ethanol, and 1% crystal violet). Number of viral foci forming units were normalized based on the average from the mock group and PRNT<sub>50</sub> was calculated with a dose-response analysis with a four-parameter logistic model (XLfit, IBDS, UK). Statistical analysis was performed with GraphPad Prism (9.4.1).

Additionally, neutralization test was performed by using CHIKV expressing nLuc gene. Test sera were heat-treated at 56°C for one hour then serially diluted in PBS at a starting dilution of 1:32. Thirty microliter of diluted serum was mixed with the same volume of diluted CHIKV-nLuc virus (600 pfu/30  $\mu$ L, quadruplicates per sample). After an hour of incubation at 37°C, 50  $\mu$ L of the virus-serum mixture was added to Vero 76 cells grown overnight in a 96-well cell culture plate then further incubated in a 37°C CO<sub>2</sub> incubator for one hour for absorption. Then cells were washed with PBC once and replenished with the cell culture media (E-MEM with 10% FBS). Cells were incubated at 37°C for two days and the nLuc activity from the virus replication was measured by using Nano-Glo Luciferase Assay System (Promega) following the manufacturer's protocol using a plate reader (HT4 Biotek). Luminescence data was normalized with values from wells with a normal mouse sera as 0% and mock infected control as 100%. PRNT<sub>50</sub> was defined as the highest reciprocal dilution of the serial dilution series that produces > 50% reduction in the nano-luciferase activity. Statistical analysis was performed using two-way ANOVA with Sidak's multiple comparisons test (GraphPad Prism).

## Results

### Design of V5040 live-attenuated CHIKV with rearranged structural genes and 181/25 E2 mutations

The genetic structures of the CHIKV pMG5040 and V5040 RNA are schematically shown in Fig 1A. The full-length, functional RNA genome of the V5040 vaccine virus was encoded in the pMG5040 plasmid downstream from the optimized CMV promoter. The pMG5040 was prepared by re-designing the prototype CHIKV iDNA clone described elsewhere [28]. The pMG5040 plasmid is intended to launch replication of live-attenuated V5040 virus with rearranged genome in mammalian cells. After transfection of Vero cells with the pMG5040, the CMV promoter directs transcription of the functional viral genomic RNA starting from the 5' terminus to the 3'-terminal poly-A sequence. Compared to the wild type CHIKV genome, the structural genes of V5040 RNA genome were rearranged. The CHIKV structural gene region was split into two open reading frames (ORFs), one expressing GP genes E3-E2-6K-E1, and the other expressing the C gene only. Each structural ORF was expressed from its own 26S sub-genomic promoter, and included translational start and stop codons (Fig 1). Artificially rearranged genomes lead to the attenuation of many viruses and are resistant to reversions because many independent mutations would be required to restore the wild type virus sequence [34–36]. To further secure attenuation and safety of the experimental V5040 vaccine, mutations E2 Thr12Ile and Gly82Arg associated with attenuation of the CHIKV 181/25 vaccine were introduced in the GP region of the pMG5040 and V5040.

### Rearranged CHIKV V5040 replicates in Vero cells transfected with pMG5040 iDNA plasmid

Potentially, rearrangement of the genes can severely affect, or even prevent, replication of the CHIKV. To evaluate if V5040 virus can replicate, pMG5040 plasmid encoding rearranged CHIKV RNA genome was transfected in cultured cells as described in Materials and Methods. The pMG5040 was isolated from *E. coli* (Fig 1B). To launch V5040 CHIKV, pMG5040 plasmid was transfected into Vero cells (ATCC CCL-81.5). Unlike infection with CHIKV, which replicates in the cytoplasm, the transfection of pMG5040 leads to transcription of rearranged genomic RNA in the nuclei of transfected cells, and genomic RNA is transported to the cytoplasm where RNA translation and virus synthesis take place. After transfection, expression of replication competent virus was confirmed by plaque assay in the growth medium harvested from

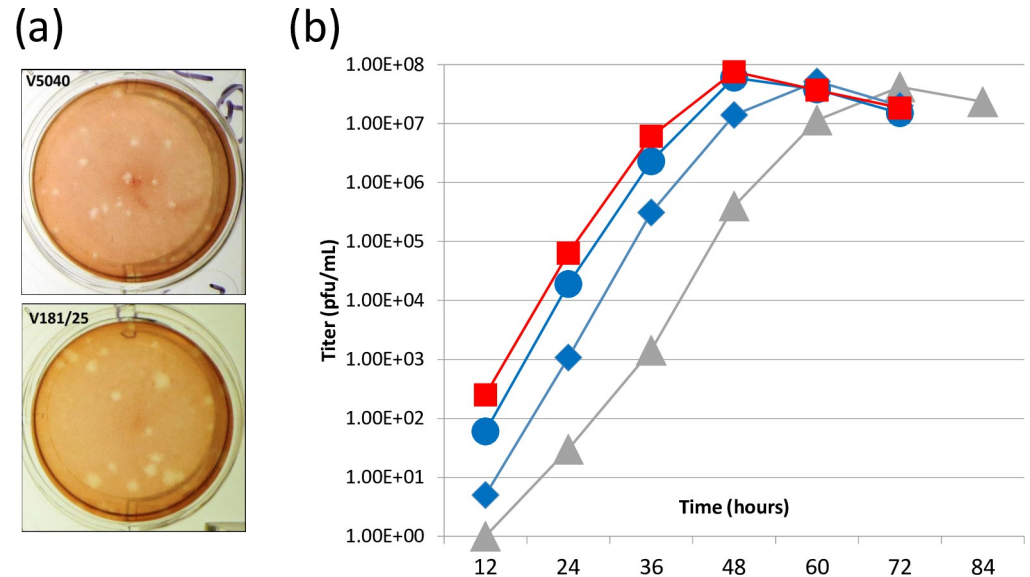

**Fig 2. Preparation of V5040 CHIKV in Vero cells.** (a) Plaque morphology of attenuated V5040 and 181/25 vaccine viruses. (b). Comparison of the growth kinetics of V5040 in Vero cell infected with V5040 ( $10^2$  PFU, blue diamonds;  $10^3$  PFU, blue circles) or transfected with pMG5040 (100 ng, grey triangles). As control, CHIKV 181/25 vaccine virus was used ( $10^3$  PFU, red squares).

<https://doi.org/10.1371/journal.pntd.0012120.g002>

transfected cells. As seen in Fig 2, incubation of cells with the medium from pMG5040-transfected cells (see Materials and Methods) generated plaques under agarose overlay at 24–48 h post infection (Fig 2). Compared to control CHIKV 181/25-generated plaques, V5040 plaques were smaller in diameter. This may reflect additional attenuation of V5040 in comparison with the prototype live-attenuated 181/25 virus; however, additional quantitative studies are needed to evaluate differences in the level of attenuation in both highly attenuated vaccines. The V5040 virus harvested from the supernatant at 48 h post-transfection had an infectious titer  $10^8$  PFU/mL indicating successful rescue of replication-competent virus from pMG5040 iDNA plasmid and efficient replication of V5040 in Vero cells. Genetic rearrangement and attenuating mutations in the V5040 virus were confirmed by isolating RNA, preparing cDNA, and sequencing of 3.1 kb PCR fragment spanning region from E3 to C gene using GP E3 forward and C reverse primers (Fig 1). Expression of CHIKV-specific antigens in V5040-infected cells was confirmed by IFA using CHIKV-specific antiserum VR-1241AF as described elsewhere [28].

In the next experiment, we compared replication of V5040 virus in Vero cells infected either with the V5040 virus (100 PFU or 1000 PFU representing MOI of  $10^{-5}$  and  $10^{-4}$ , respectively), or transfected with pMG5040 plasmid. As a control, we used experimental CHIKV 181/25 vaccine. Samples of the culture medium from transfected and infected cells were collected every 12 h and the viral titers were quantitated by plaque assay. As shown in Fig 2(B), infection at MOI of  $10^{-5}$  resulted in effective virus replication comparable with CHIKV 181/25 kinetics and reached  $10^8$  PFU/ml at 48 h post infection. Infection at lower MOI  $10^{-4}$  had similar kinetics peaking at 60 h. p. i. In pMG5040-transfected cells, most cells expressed CHIKV antigens at 48 h post-transfection and infectious virus in culture medium approached  $10^8$  PFU/ml at 72 h. The observed delay of the peak titer in pMG5040 transfected cells as compared to V5040 infected cells can be explained by the timing associated with cell recovery after pMG5040 electroporation and by delay associated with DNA penetrating the nuclei of transfected cells, transcription of RNA and transport into cytoplasm to start replication of V5040.



Thus, replication of V5040 virus from plasmid is expected to be delayed causing peak titer at a later point as compared to the control CHIKV 181/25 virus. Similar observation was made with DNA-launched Venezuelan equine encephalitis virus (VEEV), a related rearranged alphavirus [37]. Based on our experiments, we observed that infection 100–1000 PFU of V5040 virus, or transfection with 100 ng of pMG5040 iDNA efficiently initiated replication of live attenuated CHIKV *in vitro*.

### Rearranged V5040 virus is immunogenic in mice

To evaluate general safety and immunogenicity of rearranged V5040 CHIKV vaccine, we used immunocompetent BALB/c and C57BL/6 mice. The goal of the experiments in two strains of immunocompetent mice was to demonstrate non-inferiority of rearranged V5040 to 181/25 vaccine in terms of safety and immunogenicity. In the first experiment, BALB/c mice were vaccinated with a single s.c. dose of  $10^4$  PFU or  $10^5$  of V5040 virus prepared from the growth medium of pMG5040-transfected Vero cells. Similarly, 181/25 virus was administered as control. After injections, all mice remained healthy with no detectable adverse effects such as changes in weight or behavior. Serum samples were collected as described in Materials and Methods. Viremia was not detectable in V5040-vaccinated mice by direct plaque assay (detection limit 25 PFU/ml). However, in 40% of the vaccinated mice, low viremia was detected by co-cultivation assay (Table 2). At day 28, mice seroconverted as determined by IFA and western blot (Table 2; Fig 3). Similarly, BALB/c mice vaccinated with a single s.c. dose of  $10^5$  PFU of V5040 virus did not show any safety concerns and developed antibody response (Table 2).

Next, we evaluated V5040 immunogenicity and neutralization activity of antisera from V5040-vaccinated C57BL/6 mice using a standard PRNT<sub>50</sub> assay, as well as neutralization of CHIKV-nLuc virus. As control, we used 181/25 vaccine. In a standard PRNT<sub>50</sub> assay, both vaccines demonstrated measurable neutralization activity starting from 7 days post vaccination after a single dose of vaccine (Fig 4). Compared to 181/25 CHIKV vaccine, iDNA-based V5040 vaccine induced stronger and more durable PRNT<sub>50</sub> neutralizing titers. While approximately 50% (4–5 / 8 mice, per group) of 181/25 vaccinated mice showed a measurable neutralization activity (>1:32), nearly all of V5040 vaccinated mice demonstrated PRNT<sub>50</sub> > 1:128 after 14 days post vaccination, with maximum titer of 1:512. It appeared that V5040 showed a better longevity of neutralization activity, showing a significantly higher PRNT<sub>50</sub> titer compared to CHIKV 181/25 at 42 days post vaccination ( $p < 0.0007$ , Two-way ANOVA, mixed effect model). Additional experiments are needed to confirm duration of immunity.

CHIKV-neutralizing effect of serum from vaccinated mice was confirmed in a CHIKV-nLuc virus-based neutralization experiment (Fig 5). Neutralization was detected in both V5040 and 181/25 vaccinated sera, with highest titers up to 1:1024 in V5040 vaccinated mice. Again, the V5040-vaccinated mice appeared to have higher titer of neutralization, with  $p = 0.0152$  between V5040 and 181/25 groups (Fig 5). However, on day 42, difference in

**Table 2. Summary of immunogenicity of V5040 CHIKV vaccine in BALB/c and C57BL/6 mice.**

|        | Mouse Model | Dose, PFU (route)      | N (M/F) | Viremia after vaccine | Serum Antibody                   | Protection from infection |
|--------|-------------|------------------------|---------|-----------------------|----------------------------------|---------------------------|
| Exp. 1 | BALB/c      | $10^4$ (s.c.)          | 5 (F)   | -                     | + (WB, IFA, PRNT <sub>50</sub> ) | nt                        |
|        |             | $10^5$ (s.c.)          | 5 (F)   | -/+*                  |                                  | nt                        |
| Exp. 2 | C57BL/6J    | $10^5$ (s.c.)          | 8 (M/F) | nt                    | + (ELISA, PRNT <sub>50</sub> )   | nt                        |
| Exp.3  | C57BL/6     | $2 \times 10^5$ (s.c.) | 8 (M/F) | nt                    | nt                               | +                         |

PFU, plaque-forming units; s.c., subcutaneously; WB, western blot; IFA, indirect immunofluorescence assay; PRNT<sub>50</sub>, plaque reduction neutralization assay; M, males; F, females; nt, not tested. \*Viremia detected by virus amplification from plasma.

<https://doi.org/10.1371/journal.pntd.0012120.t002>

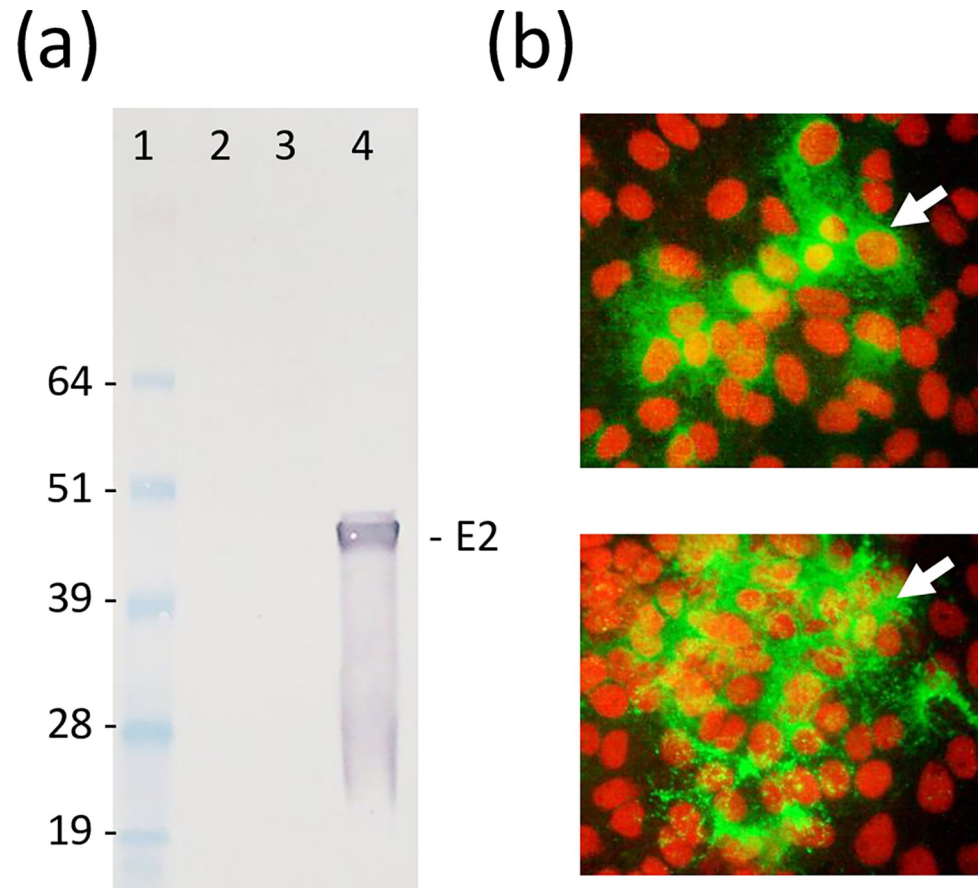

**Fig 3. Immunogenicity of V5040 virus in mice.** (a) western blot and (b) IFA with antisera from BALB/c mice vaccinated with V5040 virus. (a) For western blot, mouse serum was probed at 1:100 dilution followed by AP-conjugated goat anti-mouse IgG (H+L) secondary antibody (1:1000 dilution). Lane 1, SeeBlue Plus2 standard, Lane 2, control Vero cell lysate; Lane 3, blank; Lane 4, lysate of Vero cells infected with CHIKV 181/25 virus. Predicted band of E2 is indicated. (b) For IFA, Vero cells seeded in chamber slides were infected with V5040 at MOI 0.01. At 24 h post-infection, infected monolayer cells were fixed with acetone and probed with mouse serum diluted 1:25, followed by FITC-conjugated goat anti-mouse IgG (H+L) secondary antibody (1:25 dilution). Infected Vero monolayers developed foci of V5040-infected cells shown in green (indicated with arrows). Nuclei are stained in red using VectaShield mounting medium containing propidium iodide.

<https://doi.org/10.1371/journal.pntd.0012120.g003>

neutralization between V5040 and 181/25 was not significant. The observed titers are expected to be protective, as  $PRNT_{50} \geq 10$  may be sufficient to correlate with protection from symptomatic infection and subclinical seroconversion [38].

To evaluate if immune response to V5040 inhibits replication of subsequent CHIKV infection, in another experiment, C57BL/6 mice were challenged with CHIKV-nLuc virus. Expression of nLuc with bioluminescence signal was detected at day 2 postinfection at the site of CHIKV-nLuc injection only in the challenged, PBS sham-vaccinated mice, while not detected in either V5040 or 181/25 vaccinated animals (Fig 6). Infection with CHIKV nLuc appeared contained at day 2 in the proximity of injection site. The result confirmed that rearranged V5040, as well as the control 181/25 vaccines can inhibit replication of CHIKV-nLuc virus.

In summary, although additional experiments are needed to evaluate protection and potential difference in magnitude of the neutralizing response between two highly attenuated viruses, the results clearly indicate high level of neutralization activity of serum from mice vaccinated with rearranged V5040 CHIKV.

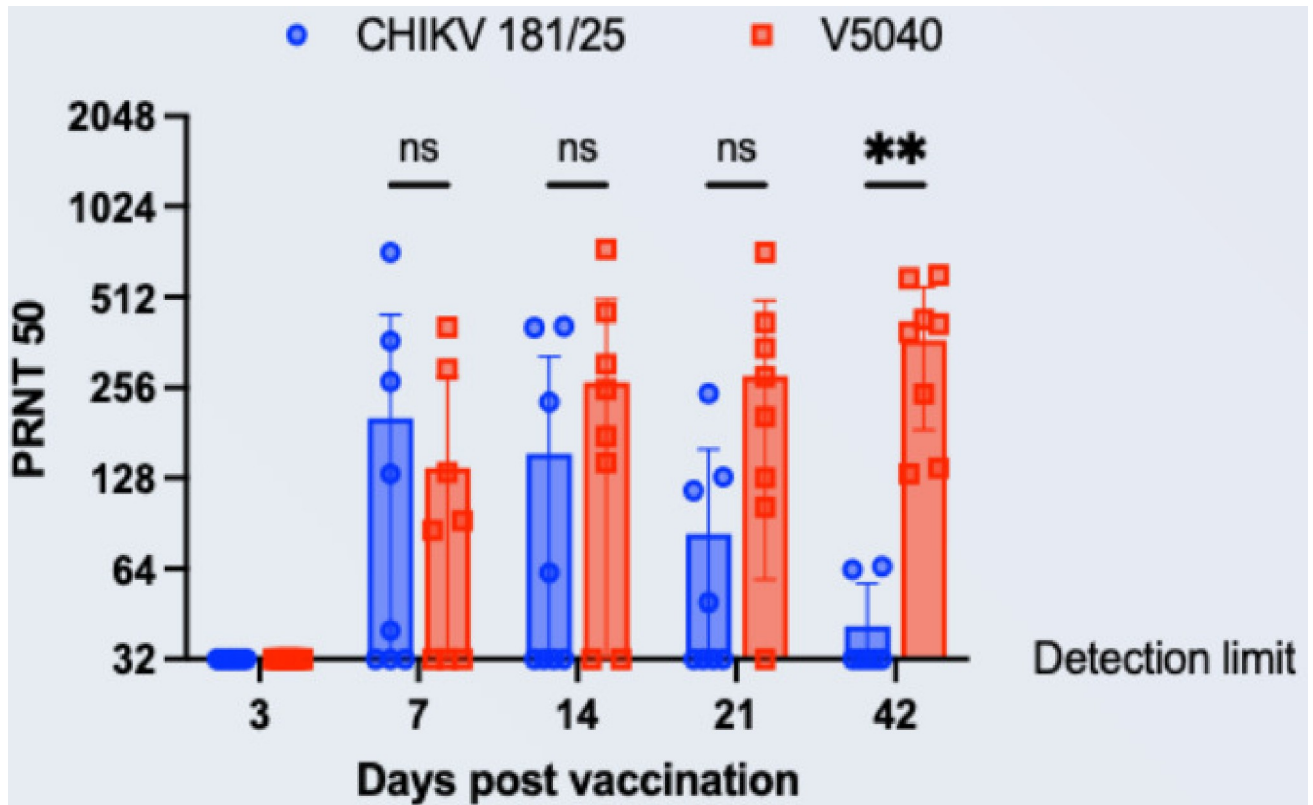

**Fig 4. Neutralization antibodies from C57BL/6 mice vaccinated with V5040 or CHIKV 181/25.** Antisera collected from terminal bleeding of mice vaccinated either with V5040 or CHIKV 181/25 were tested for PRNT<sub>50</sub> assays against their corresponding homologous virus. Blue circles and red squares indicate antisera of CHIKV 181/25 and V5040, and each symbol represents serum from an individual mouse ( $n = 8/\text{group}/\text{timepoint}$ ). The bar and whiskers indicate the means and  $\pm$  their standard deviation. Ns: not significant. \*\*,  $P < 0.0021$ , Two-Way ANOVA with Sidak's multiple comparisons test (Prism).

<https://doi.org/10.1371/journal.pntd.0012120.g004>

## Discussion

Live attenuated vaccines represent approximately half of all licensed vaccines in the U.S. [39]. Live vaccines Zostavax, RotaTeq (Merck), FluMist (AstraZeneca), Rotarix (GSK), and CHIKV vaccine IXCHIQ (Valneva) have been recently approved showing that live attenuated platform can be configured to meet stringent FDA safety standards.

Because of its clinical history, the 181/25 vaccine is a good starting point for CHIKV vaccine development. In early studies, experimental CHIKV vaccine clone 181/25 was reported as highly immunogenic in Phase II clinical trial; however, mild transient arthralgia was observed in some patients [24]. Vaccine was evaluated in 59 healthy volunteers, with 98% seroconversion rate. However, up to 8% experienced mild transient arthralgia [24]. Reversion mutations have been detected in viremic patients that received the 181/25 IND vaccine [26] indicating the need for safety improvement.

Previously, we developed iDNA approach as a novel infectious clone plasmid, in which the full-length viral RNA genome is transcribed from the CMV promoter [27,33,40]. Using iDNA approach, we prepared the iDNA encoding the prototype 181/25 CHIKV vaccine [28]. The latter encoded 181/25 genomic RNA in the plasmid downstream from CMV promoter. This plasmid launched the CHIKV 181/25-like vaccine virus in cell culture and *in vivo*. Vaccination of BALB/C mice with this 181/25 iDNA plasmid protected mice from CHIKV challenge [28]. The attenuating mutations in the iDNA-generated virus were confirmed by DNA sequencing,

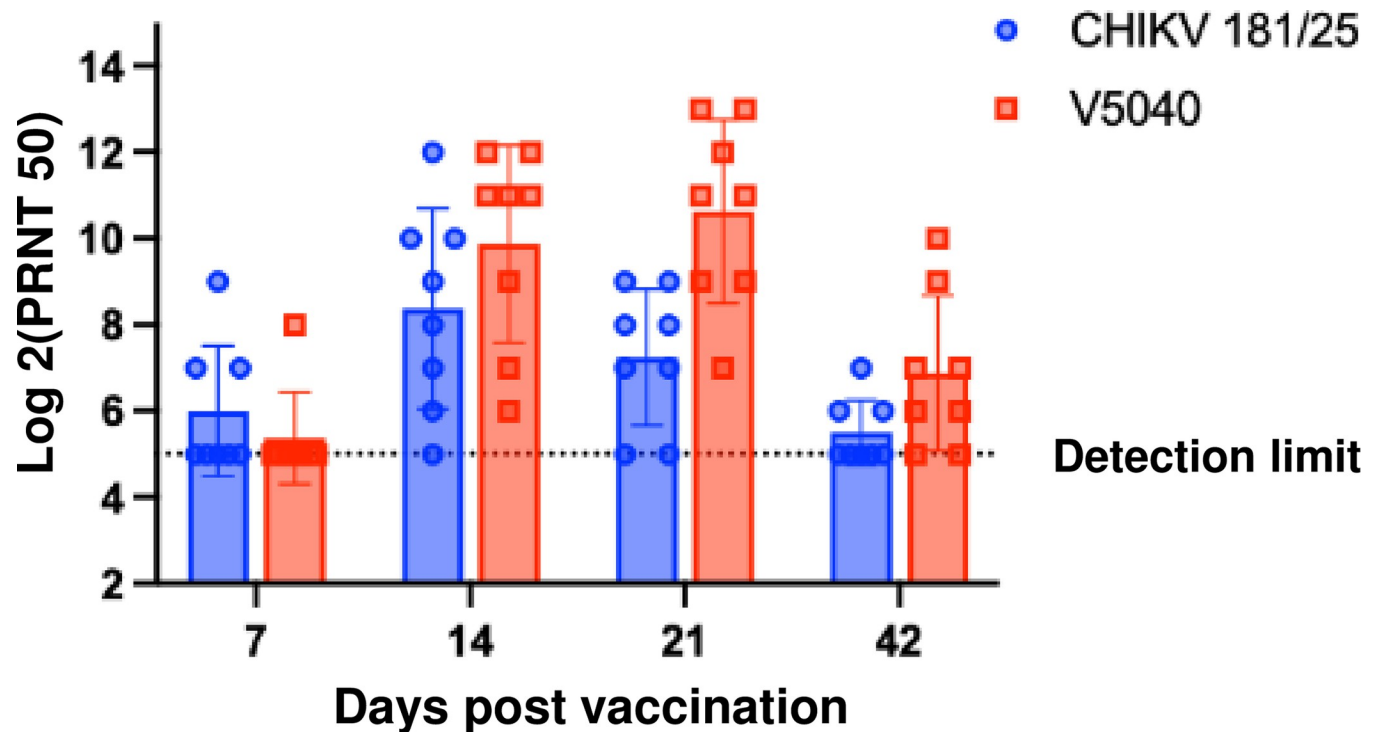

**Fig 5. Anti-CHIKV neutralization activity of antisera immunized with CHIKV 181/25 and V5040 vaccine.** Diluted serum was mixed with the same volume of diluted CHIKV-nLuc virus (600 pfu) for 1h, then used to infect Vero 76 cells in a 96-well cell culture plate for two days. The nLuc activity from the virus replication was measured by using Nano-Glo Luciferase Assay System (Promega) following the manufacturer's protocol using a plate reader (HT4 Biotek). Each data points represents a group of 8 mice (4 male and 4 female), with  $p = 0.0152$  between 181/25 and V5040 groups. The statistical analysis was performed with GraphPad Prism using two-way ANOVA.

<https://doi.org/10.1371/journal.pntd.0012120.g005>

with no reversions detected [41]. Additionally, the iDNA-derived virus is expected to have lower heterogeneity (% SNPs) at the attenuating-mutation sites, E2-12 and E2-82, as compared to the prototype 181/25 virus. In a previous study, the iDNA-derived RNA had fewer SNPs vs. the 181/25 virus vaccine, suggesting potential safety advantage vs. classic live-attenuated virus [41]. Any additional measures to enhance safety of 181/25 backbone would also be desirable.

Genetic rearrangements potentially can be utilized to engineer safer live-attenuated vaccines [29]. Gene rearrangement is expected to be highly resistant to reversion because multiple independent mutations would be needed to restore wild-type genotype. In another study, we prepared a rearranged V4020 vaccine from the alphavirus vaccine TC83 for Venezuelan equine encephalitis virus (VEEV) [37]. V4020 vaccine was safer than TC83, immunogenic, and efficacious in mice and non-human primates [37,42,43] suggesting genetic rearrangement can be used for distinct alphavirus vaccines to improve safety.

Here, we applied genetic rearrangement for the development of novel CHIKV live-attenuated vaccine based on an investigational 181/25 live-attenuated CHIKV vaccine. The main goal of this study was to demonstrate feasibility of rearranged genome in CHIKV V5040, and the non-inferiority of V5040 as compared to 181/25 vaccine. In the pMG5040 iDNA plasmid, the DNA copy of the genome of CHIKV vaccine virus is rearranged, with the capsid gene placed downstream from the glycoprotein genes using a duplicate subgenomic promoter. This gene rearrangement does not affect the protein sequence and the immunogenic epitopes. However, until now it was not known if rearrangement can be engineered for CHIKV 181/25 live-attenuated vaccine without impairing its fitness *in vitro* and *in vivo*. Therefore, in this



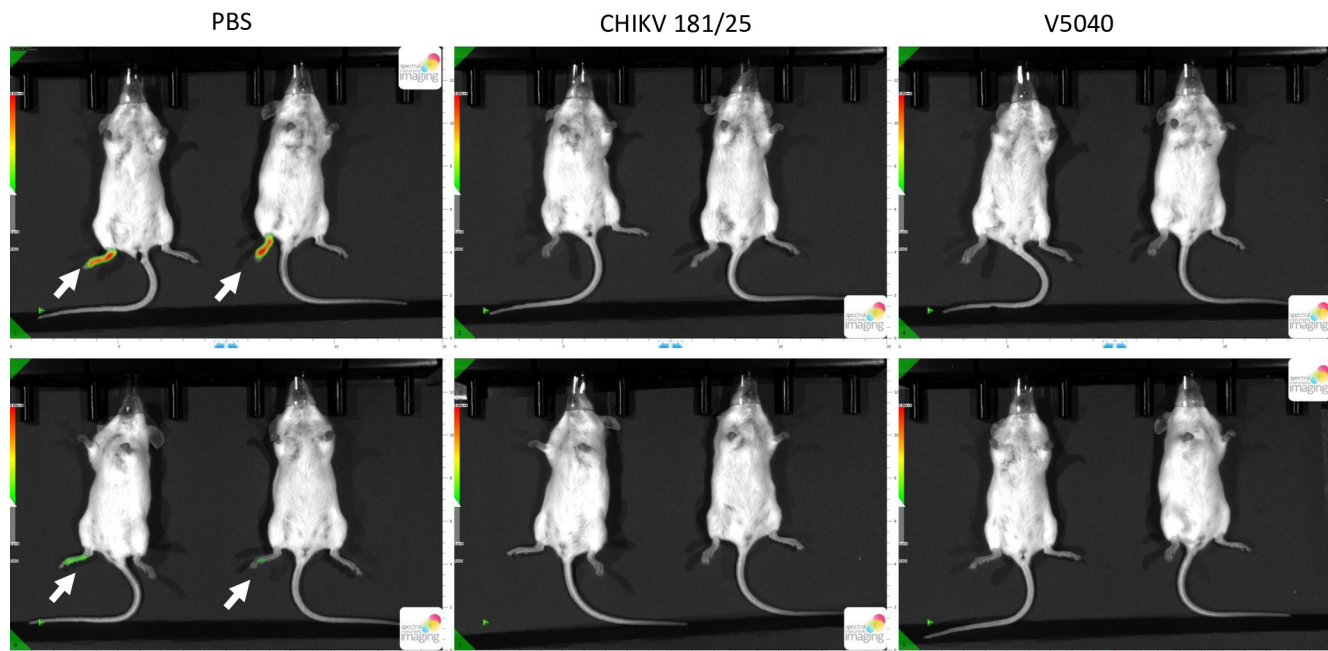

**Fig 6. Representative bioluminescence images from each group are shown (upper and lower panels).** C57/BL6 were vaccinated either with PBS (sham), CHIKV 181/25, or V5040 via the s.c. route at the both flanks with  $2 \times 10^5$  pfu). PBS and vaccine groups (CHIKV 181/25 and V5040) are indicated on the top of the Figure. Three weeks later animals were infected with  $5 \times 10^5$  pfu of CHIKV181/25-nLuc at the right footpad via the s.c. route. Two days later animals were subjected with bioluminescence imaging with  $9 \mu\text{mole/kg}$  of FFz (i.p. injection) as described in Materials and Methods. Four mice on the left were sham-vaccinated (PBS group) and showed strong bioluminescence signal at the footpad (arrows) after infection with CHIKV181/25-nLuc virus indicating replication of the challenge virus. In contrast, four mice vaccinated with CHIKV 181/25 vaccine (center panels) or V5040 vaccine (four mice on the right panels) did not show bioluminescence signal suggesting protective effect of both CHIKV 181/25 and V5040 vaccines against infection with CHIKV181/25-nLuc virus.

<https://doi.org/10.1371/journal.pntd.0012120.g006>

study, we showed that V5040 virus efficiently replicates in pMG5040-transfected Vero cells. Finally, general safety and immunogenicity was shown *in vivo* by vaccinating mice with V5040.

Taken together, our results showed the feasibility of iDNA approach to prepare CHIKV with rearranged genome. Potentially, iDNA vaccine can be used for vaccination directly, by injection into muscle of the vaccine recipient. Such iDNA vaccine would combine the benefits of conventional DNA immunization, except it uses small quantities of DNA to launch efficacious live-attenuated vaccines [27]. The iDNA vaccine turns a small number of cells in muscle of vaccine recipients into cell-scale vaccine “factories”. The iDNA uses a well-established manufacturing technology of bacterial production of plasmids, which are easier to bank, control, and manipulate vs. live virus stocks. Since iDNA plasmids represent genetically defined homogenous clones that after vaccination make the virus that undergoes minimal replication cycles, the probability of reversion mutations compared to traditional manufacturing is reduced [27]. The iDNA vaccination may also have additional advantage for immunogenicity due to immunostimulatory effects of DNA vaccine. In addition to improved safety and immunogenicity, a CHIKV iDNA vaccine offers the potential advantages of high purity, genetic stability, simplicity of production, no cold chain, single-dose vaccination, and long-lasting immunity [27]. Thus, iDNA would combine the advantages of DNA immunization and the high efficacy of live-attenuated vaccines.

Additional research is needed on V5040 or pMG5040 as CHIKV vaccines. In the proof-of-concept experiments, we showed that vaccination of BALB/C mice with the iDNA-based 181/



25 vaccine protected them from CHIKV challenge [28]. However, pMG5040 has not yet been tested in an iDNA format for vaccination. In addition, protective effect of V5040 vaccine needs to be tested against challenge with the wild-type CHIKV. Potentially, neurovirulent CHIKV Ross strain can be used for this purpose [28], as well as suckling mice and A129 and AG129 mice with interferon-defective genotypes [44]. Furthermore, advanced safety, immunogenicity, and efficacy studies in non-human primates will be also needed for pre-clinical testing of CHIKV vaccine. Non-human primates have been successfully used to evaluate the safety and immunogenicity of live CHIKV and other vaccines [45]. Another future project is to confirm that no reversion mutations occur *in vivo*. To address this, genetic stability studies *in vivo* (multiple passages in tissues and adult mouse brains) can be carried out to provide additional safety information as previously described [43].

Several other experimental CHIKV vaccines have been described. These include live chimeric alphaviruses that carry CHIKV structural proteins [46], as well as formalin-inactivated vaccine adjuvanted with aluminum hydroxide [47]. Furthermore, a virus-like particle (VLP) CHIKV vaccine protected nonhuman primates from CHIKV challenge [48, 49] and is currently in the clinical trials. VLP vaccine has achieved immunogenicity milestones in the clinical trial. Standard DNA-based vaccines are another promising vaccination strategy [50]. However, many of experimental vaccines required two or more vaccinations to elicit protective immune response, which could be a disadvantage when rapid control of an outbreak is needed. A single-dose CHIKV vaccine that protects for the long-term would be a major benefit to global health. Measles virus-vectored CHIKV vaccine is currently in the clinical trials [51]. Also, successful completion of Phase 3 trial and FDA approval of single-dose chikungunya vaccine was announced, CHIKV IXCHIQ  $\Delta$ 5nsP3 (VLA1553) [52].

The proposed rearranged iDNA-derived V5040 vaccine is designed to improve safety of 181/25 vaccine derived from an Asian lineage, and to induce effective immunity after a single injection. Live-attenuated V5040 vaccine has a favorable cost/benefit ratio, includes innovative safety features, and potentially can be used to vaccinate individuals at risk of CHIKV infection, as well as for rapid deployment in outbreak situations to immunize against CHIKV in endemic and non-endemic areas. Current study confirms feasibility of rearranged V5040 experimental vaccine for further detailed evaluation including detailed safety *in vitro* and *in vivo*, as well as efficacy against challenge with virulent CHIKV in animal models.

## Acknowledgments

Authors sincerely thank Elena Klyushnenkova, Alex Tibbens and Noble Life for experimental contributions. The content is solely the responsibility of the authors and does not necessarily represent the official views of funding agencies.

## Author Contributions

**Conceptualization:** Irina Tretyakova, Igor S. Lukashevich, Donghoon Chung, Peter Pushko.

**Data curation:** Irina Tretyakova, Joongho Joh.

**Funding acquisition:** Peter Pushko.

**Investigation:** Mary Gearon, Jennifer Kraenzle, Sidney Goedeker, Ava Pignataro, Brian Alejandro.

**Methodology:** Joongho Joh, Mary Gearon, Jennifer Kraenzle, Sidney Goedeker, Ava Pignataro, Brian Alejandro.

**Supervision:** Joongho Joh, Donghoon Chung, Peter Pushko.

**Visualization:** Donghoon Chung.

**Writing – original draft:** Irina Tretyakova.

**Writing – review & editing:** Igor S. Lukashevich, Donghoon Chung, Peter Pushko.

## References

1. Thiboutot MM, Kannan S, Kawalekar OU, Shedlock DJ, Khan AS, Sarangan G, et al. Chikungunya: a potentially emerging epidemic? *PLoS Negl Trop Dis*. 2010; 4(4):e623. <https://doi.org/10.1371/journal.pntd.0000623> PMID: 20436958; PubMed Central PMCID: PMC2860491.
2. Tsetsarkin KA, Vanlandingham DL, McGee CE, Higgs S. A single mutation in chikungunya virus affects vector specificity and epidemic potential. *PLoS Pathog*. 2007; 3(12):e201. <https://doi.org/10.1371/journal.ppat.0030201> PMID: 18069894; PubMed Central PMCID: PMC2134949.
3. Vazeille M, Moutailler S, Coudrier D, Rousseaux C, Khun H, Huerre M, et al. Two Chikungunya isolates from the outbreak of La Reunion (Indian Ocean) exhibit different patterns of infection in the mosquito, *Aedes albopictus*. *PLoS One*. 2007; 2(11):e1168. <https://doi.org/10.1371/journal.pone.0001168> PMID: 18000540; PubMed Central PMCID: PMC2064959.
4. Jossier L, Paquet C, Zehnoun A, Caillere N, Le Tertre A, Solet JL, et al. Chikungunya disease outbreak, Reunion Island. *Emerg Infect Dis*. 2006; 12(12):1994–5. <https://doi.org/10.3201/eid1212.060710> PMID: 17354339; PubMed Central PMCID: PMC3291364.
5. Jain M, Rai S, Chakravarti A. Chikungunya: a review. *Trop Doct*. 2008; 38(2):70–2. <https://doi.org/10.1258/td.2007.070019> PMID: 18453487.
6. Arankalle VA, Shrivastava S, Cherian S, Gunjekar RS, Walimbe AM, Jadhav SM, et al. Genetic divergence of Chikungunya viruses in India (1963–2006) with special reference to the 2005–2006 explosive epidemic. *J Gen Virol*. 2007; 88(Pt 7):1967–76. <https://doi.org/10.1099/vir.0.82714-0> PMID: 17554030.
7. Zeller H, Van Bortel W, Sudre B. Chikungunya: Its History in Africa and Asia and Its Spread to New Regions in 2013–2014. *J Infect Dis*. 2016; 214(suppl 5):S436–S40. <https://doi.org/10.1093/infdis/jiw391> PMID: 27920169.
8. Sam IC, AbuBakar S. Chikungunya virus infection. *Med J Malaysia*. 2006; 61(2):264–9. PMID: 16898330.
9. Enserink M. INFECTIOUS DISEASES. An obscure mosquito-borne disease goes global. *Science*. 2015; 350(6264):1012–3. <https://doi.org/10.1126/science.350.6264.1012> PMID: 26612926.
10. Entomology Enserink M. A mosquito goes global. *Science*. 2008; 320(5878):864–6. <https://doi.org/10.1126/science.320.5878.864> PMID: 18487167.
11. Lanciotti RS, Kosoy OL, Laven JJ, Panella AJ, Velez JO, Lambert AJ, et al. Chikungunya virus in US travelers returning from India, 2006. *Emerg Infect Dis*. 2007; 13(5):764–7. <https://doi.org/10.3201/eid1305.070015> PMID: 17553261; PubMed Central PMCID: PMC2738459.
12. Epstein PR. Chikungunya Fever resurgence and global warming. *Am J Trop Med Hyg*. 2007; 76(3):403–4. PMID: 17360858.
13. Pistone T, Ezzedine K, Schuffenecker I, Receveur MC, Malvy D. An imported case of Chikungunya fever from Madagascar: use of the sentinel traveller for detecting emerging arboviral infections in tropical and European countries. *Travel Med Infect Dis*. 2009; 7(1):52–4. <https://doi.org/10.1016/j.tmaid.2008.10.001> PMID: 19174303.
14. Burt FJ, Chen W, Miner JJ, Lenschow DJ, Merits A, Schnettler E, et al. Chikungunya virus: an update on the biology and pathogenesis of this emerging pathogen. *Lancet Infect Dis*. 2017; 17(4):e107–e17. [https://doi.org/10.1016/S1473-3099\(16\)30385-1](https://doi.org/10.1016/S1473-3099(16)30385-1) PMID: 28159534.
15. Schwartz O, Albert ML. Biology and pathogenesis of chikungunya virus. *Nat Rev Microbiol*. 2010; 8(7):491–500. <https://doi.org/10.1038/nrmicro2368> PMID: 20551973.
16. Dhiman RC, Pahwa S, Dhillon GP, Dash AP. Climate change and threat of vector-borne diseases in India: are we prepared? *Parasitol Res*. 2010; 106(4):763–73. <https://doi.org/10.1007/s00436-010-1767-4> PMID: 20155369.
17. Queyriaux B, Simon F, Grandadam M, Michel R, Tolou H, Boutin JP. Clinical burden of chikungunya virus infection. *Lancet Infect Dis*. 2008; 8(1):2–3. [https://doi.org/10.1016/S1473-3099\(07\)70294-3](https://doi.org/10.1016/S1473-3099(07)70294-3) PMID: 18156079.
18. Couderc T, Chretien F, Schilte C, Disson O, Brigitte M, Guivel-Benhassine F, et al. A mouse model for Chikungunya: young age and inefficient type-I interferon signaling are risk factors for severe disease. *PLoS Pathog*. 2008; 4(2):e29. <https://doi.org/10.1371/journal.ppat.0040029> PMID: 18282093; PubMed Central PMCID: PMC2242832.

19. Weaver SC, Reisen WK. Present and future arboviral threats. *Antiviral Res.* 2010; 85(2):328–45. <https://doi.org/10.1016/j.antiviral.2009.10.008> PMID: 19857523; PubMed Central PMCID: PMC2815176.
20. Brehin AC, Casademont I, Frenkiel MP, Julier C, Sakuntabhai A, Despres P. The large form of human 2',5'-Oligoadenylate Synthetase (OAS3) exerts antiviral effect against Chikungunya virus. *Virology.* 2009; 384(1):216–22. <https://doi.org/10.1016/j.virol.2008.10.021> PMID: 19056102.
21. Petersen LR, Stramer SL, Powers AM. Chikungunya virus: possible impact on transfusion medicine. *Transfus Med Rev.* 2010; 24(1):15–21. <https://doi.org/10.1016/j.tmr.2009.09.002> PMID: 19962571.
22. Schneider M, Narciso-Abraham M, Hadl S, McMahon R, Toepfer S, Fuchs U, et al. Safety and immunogenicity of a single-shot live-attenuated chikungunya vaccine: a double-blind, multicentre, randomised, placebo-controlled, phase 3 trial. *Lancet.* 2023; 401(10394):2138–47. [https://doi.org/10.1016/S0140-6736\(23\)00641-4](https://doi.org/10.1016/S0140-6736(23)00641-4) PMID: 37321235; PubMed Central PMCID: PMC10314240 and own stock and share options of Valneva. RH is an inventor in a patent relevant to the work. RMa and JLS are consultants of Valneva and have received payments.
23. Schmidt C, Schnierle BS. Chikungunya Vaccine Candidates: Current Landscape and Future Prospects. *Drug Des Devel Ther.* 2022; 16:3663–73. <https://doi.org/10.2147/DDDT.S366112> PMID: 36277603; PubMed Central PMCID: PMC9580835.
24. Edelman R, Tacket CO, Wasserman SS, Bodison SA, Perry JG, Mangiafico JA. Phase II safety and immunogenicity study of live chikungunya virus vaccine TSI-GSD-218. *Am J Trop Med Hyg.* 2000; 62(6):681–5. <https://doi.org/10.4269/ajtmh.2000.62.681> PMID: 11304054.
25. Gorchakov R, Wang E, Leal G, Forrester NL, Plante K, Rossi SL, et al. Attenuation of Chikungunya virus vaccine strain 181/clone 25 is determined by two amino acid substitutions in the E2 envelope glycoprotein. *J Virol.* 2012; 86(11):6084–96. <https://doi.org/10.1128/JVI.06449-11> PMID: 22457519; PubMed Central PMCID: PMC3372191.
26. Glass PJ, Lybarger, E.A., Teehee, M.L. and Parker, M.D. Chikungunya virus strain TSI-GSD-218-VR1. GenBank Accession No. EF452494. 2007.
27. Pushko P, Lukashevich IS, Weaver SC, Tretyakova I. DNA-launched live-attenuated vaccines for bio-defense applications. *Expert Rev Vaccines.* 2016; 15(9):1223–34. <https://doi.org/10.1080/14760584.2016.1175943> PMID: 27055100; PubMed Central PMCID: PMC5033646.
28. Tretyakova I, Hearn J, Wang E, Weaver S, Pushko P. DNA vaccine initiates replication of live attenuated chikungunya virus in vitro and elicits protective immune response in mice. *J Infect Dis.* 2014; 209(12):1882–90. <https://doi.org/10.1093/infdis/jiu114> PMID: 24585894; PubMed Central PMCID: PMC4038148.
29. Bull JJ. Evolutionary reversion of live viral vaccines: Can genetic engineering subdue it? *Virus Evol.* 2015; 1(1). <https://doi.org/10.1093/ve/vev005> PMID: 27034780; PubMed Central PMCID: PMC4811365.
30. Open Reading Frame Finder. Available from: <https://www.ncbi.nlm.nih.gov/orffinder/>.
31. BPROM. Available from: <http://linux1.softberry.com/berry.phtml?topic=bprom&group=programs&subgroup=gfindb>.
32. Splice Site Prediction by Neural Network. Available from: [https://www.fruitfly.org/seq\\_tools/splice.html](https://www.fruitfly.org/seq_tools/splice.html).
33. Tretyakova I, Lukashevich IS, Glass P, Wang E, Weaver S, Pushko P. Novel vaccine against Venezuelan equine encephalitis combines advantages of DNA immunization and a live attenuated vaccine. *Vaccine.* 2013; 31(7):1019–25. <https://doi.org/10.1016/j.vaccine.2012.12.050> PMID: 23287629; PubMed Central PMCID: PMC3556218.
34. Pushko P, Parker, M.D., Smith, J.F., Crise, B.J., inventor Live attenuated Venezuelan Equine encephalitis vaccine. U.S. Patent 6296854 patent 6,296,854. 2001.
35. Flanagan EB, Schoeb TR, Wertz GW. Vesicular stomatitis viruses with rearranged genomes have altered invasiveness and neuropathogenesis in mice. *J Virol.* 2003; 77(10):5740–8. <https://doi.org/10.1128/jvi.77.10.5740-5748.2003> PMID: 12719567; PubMed Central PMCID: PMC154046.
36. Rouxel RN, Tafalla C, Merour E, Leal E, Biacchesi S, Bremont M. Attenuated Infectious Hematopoietic Necrosis Virus with Rearranged Gene Order as Potential Vaccine. *J Virol.* 2016; 90(23):10857–66. <https://doi.org/10.1128/JVI.01024-16> PMID: 27681130; PubMed Central PMCID: PMC5110182.
37. Tretyakova I, Tibbens A, Jokinen JD, Johnson DM, Lukashevich IS, Pushko P. Novel DNA-launched Venezuelan equine encephalitis virus vaccine with rearranged genome. *Vaccine.* 2019; 37(25):3317–25. <https://doi.org/10.1016/j.vaccine.2019.04.072> PMID: 31072736.
38. Yoon IK, Srikiatkachorn A, Alera MT, Fernandez S, Cummings DAT, Salje H. Pre-existing chikungunya virus neutralizing antibodies correlate with risk of symptomatic infection and subclinical seroconversion in a Philippine cohort. *Int J Infect Dis.* 2020; 95:167–73. <https://doi.org/10.1016/j.ijid.2020.03.073> PMID: 32247051.

39. Plotkin S, Robinson JM, Cunningham G, Iqbal R, Larsen S. The complexity and cost of vaccine manufacturing—An overview. *Vaccine*. 2017; 35(33):4064–71. <https://doi.org/10.1016/j.vaccine.2017.06.003> PMID: 28647170; PubMed Central PMCID: PMC5518734.
40. Tretyakova I, Nickols B, Hidajat R, Jokinen J, Lukashevich IS, Pushko P. Plasmid DNA initiates replication of yellow fever vaccine in vitro and elicits virus-specific immune response in mice. *Virology*. 2014;468–470:28–35. <https://doi.org/10.1016/j.virol.2014.07.050> PMID: 25129436; PubMed Central PMCID: PMC4252618.
41. Hidajat R, Nickols B, Forrester N, Tretyakova I, Weaver S, Pushko P. Next generation sequencing of DNA-launched Chikungunya vaccine virus. *Virology*. 2016; 490:83–90. <https://doi.org/10.1016/j.virol.2016.01.009> PMID: 26855330; PubMed Central PMCID: PMC4773897.
42. Tretyakova I, Plante KS, Rossi SL, Lawrence WS, Peel JE, Gudjohnsen S, et al. Venezuelan equine encephalitis vaccine with rearranged genome resists reversion and protects non-human primates from viremia after aerosol challenge. *Vaccine*. 2020; 38(17):3378–86. <https://doi.org/10.1016/j.vaccine.2020.02.007> PMID: 32085953.
43. Johnson DM, Sokoloski KJ, Jokinen JD, Pfeffer TL, Chu YK, Adcock RS, et al. Advanced Safety and Genetic Stability in Mice of a Novel DNA-Launched Venezuelan Equine Encephalitis Virus Vaccine with Rearranged Structural Genes. *Vaccines (Basel)*. 2020; 8(1). <https://doi.org/10.3390/vaccines8010114> PMID: 32121666; PubMed Central PMCID: PMC7157698.
44. Rafael KC, Preciado-Llanes L, Azar SR, Kim YC, Brandon O, Lopez-Camacho C, et al. Adenoviral-Vectored Mayaro and Chikungunya Virus Vaccine Candidates Afford Partial Cross-Protection From Lethal Challenge in A129 Mouse Model. *Front Immunol*. 2020; 11:591885. <https://doi.org/10.3389/fimmu.2020.591885> PMID: 33224148; PubMed Central PMCID: PMC7672187.
45. Broeckel R, Haese N, Messaoudi I, Streblov DN. Nonhuman Primate Models of Chikungunya Virus Infection and Disease (CHIKV NHP Model). *Pathogens*. 2015; 4(3):662–81. <https://doi.org/10.3390/pathogens4030662> PMID: 26389957; PubMed Central PMCID: PMC4584280.
46. Wang E, Volkova E, Adams AP, Forrester N, Xiao SY, Frolov I, et al. Chimeric alphavirus vaccine candidates for chikungunya. *Vaccine*. 2008; 26(39):5030–9. <https://doi.org/10.1016/j.vaccine.2008.07.054> PMID: 18692107; PubMed Central PMCID: PMC2571998.
47. Tiwari M, Parida M, Santhosh SR, Khan M, Dash PK, Rao PV. Assessment of immunogenic potential of Vero adapted formalin inactivated vaccine derived from novel ECSA genotype of Chikungunya virus. *Vaccine*. 2009; 27(18):2513–22. <https://doi.org/10.1016/j.vaccine.2009.02.062> PMID: 19368794.
48. Akahata W, Yang ZY, Andersen H, Sun S, Holdaway HA, Kong WP, et al. A virus-like particle vaccine for epidemic Chikungunya virus protects nonhuman primates against infection. *Nat Med*. 2010; 16(3):334–8. <https://doi.org/10.1038/nm.2105> PMID: 20111039; PubMed Central PMCID: PMC2834826.
49. Pumpens P, Pushko P. Virus-Like Particles: A Comprehensive Guide 2022.
50. Muthumani K, Lankaraman KM, Laddy DJ, Sundaram SG, Chung CW, Sako E, et al. Immunogenicity of novel consensus-based DNA vaccines against Chikungunya virus. *Vaccine*. 2008; 26(40):5128–34. <https://doi.org/10.1016/j.vaccine.2008.03.060> PMID: 18471943; PubMed Central PMCID: PMC2582145.
51. Ramsauer K, Schwameis M, Firbas C, Mullner M, Putnak RJ, Thomas SJ, et al. Immunogenicity, safety, and tolerability of a recombinant measles-virus-based chikungunya vaccine: a randomised, double-blind, placebo-controlled, active-comparator, first-in-man trial. *Lancet Infect Dis*. 2015; 15(5):519–27. [https://doi.org/10.1016/S1473-3099\(15\)70043-5](https://doi.org/10.1016/S1473-3099(15)70043-5) PMID: 25739878.
52. Wressnigg N, Hochreiter R, Zoihs I O, Fritzer A, Bezay N, Klingler A, et al. Single-shot live-attenuated chikungunya vaccine in healthy adults: a phase 1, randomised controlled trial. *Lancet Infect Dis*. 2020; 20(10):1193–203. [https://doi.org/10.1016/S1473-3099\(20\)30238-3](https://doi.org/10.1016/S1473-3099(20)30238-3) PMID: 32497524.
